# Supplementary material
Source: Springer Nature journal article supplement (https://www.springermedizin.de/resource/supplementary/12889_2012_5766_MOESM4_ESM.pdf/9496174)
Supplement: MOESM4 [file 9496174]

Table 4: Description of studies on the association between physical activity and Alzheimer's disease and dementia.

| Author Year        | Study                              | Baseline – measuring points     | Follow up time | Baseline sample; Age at Baseline                                         | Drop out            | Sample in Survey    | Variables – PA; Outcome                                                                                                         | Results                                                                                                                                                                                                                                                                                                 | Limitations                             |
|--------------------|------------------------------------|---------------------------------|----------------|--------------------------------------------------------------------------|---------------------|---------------------|---------------------------------------------------------------------------------------------------------------------------------|---------------------------------------------------------------------------------------------------------------------------------------------------------------------------------------------------------------------------------------------------------------------------------------------------------|-----------------------------------------|
| Laurin et al. 2001 | Canadian Study of Health and Aging | Baseline: 1991/1992 – 1996/1997 | 5 years        | 9 008 men and women – 6 434 cognitive normal persons; 65 years and older | 4 393 men and women | 4 615 men and women | PA: Older Americans Research Scale<br><i>Outcome:</i> Modified Mini-Mental State Examination; Neuropsychological test batteries | High levels of physical activity are associated with reduced risk<br>- Relative Risks [with 95% Confidence Interval] for cognitive impairment, Alzheimer's disease and dementia<br><br>cognitive impairment = 0.58 [0.41-0.83]<br>Dementia = 0.63 [0.40-0.98]<br>Alzheimer's Disease = 0.50 [0.28-0.90] | - Characterisation of physical activity |

PA = physical activity; Ref. = Reference group

| Abbott et al. 2004  | Honolulu Heart Program                                              | 1965 / 1968 - still continuing as Honolulu - Asia Aging Study - 1994/1996 - 1997/1999 | 29 - 34 years | 3 734 men of Japanese ancestry-survivors of the original Honolulu Heart Program cohort; 71-93 years | 1 477 men         | 2 257 men                              | PA: Average amount of distance walked per day; Physical Activity Index<br><i>Outcome:</i> Cognitive Abilities Screening Instrument; Informant Questionnaire on Cognitive Decline in the Elderly                                            | <p>Estimated relative risk of developing of dementia are associated with the distance walked per day</p> <table border="1" data-bbox="1234 284 1805 475"> <thead> <tr> <th></th> <th>Total dementia</th> <th>Alzheimer's disease</th> </tr> </thead> <tbody> <tr> <td>&gt;2m/d</td> <td>Ref.</td> <td>Ref.</td> </tr> <tr> <td>&lt;0.25 m/d</td> <td>2.12</td> <td>2.24</td> </tr> <tr> <td>0.25-1 m/d</td> <td>2.06</td> <td>2.21</td> </tr> <tr> <td>1-2 m/d</td> <td>1.5</td> <td>1.33</td> </tr> </tbody> </table> |           | Total dementia | Alzheimer's disease | >2m/d    | Ref. | Ref.             | <0.25 m/d           | 2.12 | 2.24             | 0.25-1 m/d                                                                                                                                                                                                              | 2.06 | 2.21 | 1-2 m/d | 1.5 | 1.33 | <p>- Results just for men<br/>- High age participants</p> |
|---------------------|---------------------------------------------------------------------|---------------------------------------------------------------------------------------|---------------|-----------------------------------------------------------------------------------------------------|-------------------|----------------------------------------|--------------------------------------------------------------------------------------------------------------------------------------------------------------------------------------------------------------------------------------------|------------------------------------------------------------------------------------------------------------------------------------------------------------------------------------------------------------------------------------------------------------------------------------------------------------------------------------------------------------------------------------------------------------------------------------------------------------------------------------------------------------------------|-----------|----------------|---------------------|----------|------|------------------|---------------------|------|------------------|-------------------------------------------------------------------------------------------------------------------------------------------------------------------------------------------------------------------------|------|------|---------|-----|------|-----------------------------------------------------------|
|                     | Total dementia                                                      | Alzheimer's disease                                                                   |               |                                                                                                     |                   |                                        |                                                                                                                                                                                                                                            |                                                                                                                                                                                                                                                                                                                                                                                                                                                                                                                        |           |                |                     |          |      |                  |                     |      |                  |                                                                                                                                                                                                                         |      |      |         |     |      |                                                           |
| >2m/d               | Ref.                                                                | Ref.                                                                                  |               |                                                                                                     |                   |                                        |                                                                                                                                                                                                                                            |                                                                                                                                                                                                                                                                                                                                                                                                                                                                                                                        |           |                |                     |          |      |                  |                     |      |                  |                                                                                                                                                                                                                         |      |      |         |     |      |                                                           |
| <0.25 m/d           | 2.12                                                                | 2.24                                                                                  |               |                                                                                                     |                   |                                        |                                                                                                                                                                                                                                            |                                                                                                                                                                                                                                                                                                                                                                                                                                                                                                                        |           |                |                     |          |      |                  |                     |      |                  |                                                                                                                                                                                                                         |      |      |         |     |      |                                                           |
| 0.25-1 m/d          | 2.06                                                                | 2.21                                                                                  |               |                                                                                                     |                   |                                        |                                                                                                                                                                                                                                            |                                                                                                                                                                                                                                                                                                                                                                                                                                                                                                                        |           |                |                     |          |      |                  |                     |      |                  |                                                                                                                                                                                                                         |      |      |         |     |      |                                                           |
| 1-2 m/d             | 1.5                                                                 | 1.33                                                                                  |               |                                                                                                     |                   |                                        |                                                                                                                                                                                                                                            |                                                                                                                                                                                                                                                                                                                                                                                                                                                                                                                        |           |                |                     |          |      |                  |                     |      |                  |                                                                                                                                                                                                                         |      |      |         |     |      |                                                           |
| Rovio et al 2005    | CADIE - Cardiovascular risk factors Aging and Incidence of Dementia | Baseline: 1972/1977/1982 or 1987 - 1998                                               | 11-26 years   | 2000 men and women; 65-79 years                                                                     | 551 men and women | 900 women, 549 men - 1449 participants | PA: Questions about the physical activity: "How often do you participate in leisure-time physical activity that lasts at least 20-30 min and causes breathlessness and sweating?"<br><i>Outcome:</i> Incidence of dementia and Alzheimer's | <p>Regular physical activity may reduce the risk or delay the onset of dementia and Alzheimer's disease</p> <p>- Odds Ratios [with 95% Confident Interval] for developing dementia and Alzheimer's disease for active people</p> <table data-bbox="1285 906 1760 999"> <tr> <td>sedentary</td> <td>=</td> <td>Ref.</td> </tr> <tr> <td>Dementia</td> <td>=</td> <td>0.55 [0.30-1.01]</td> </tr> <tr> <td>Alzheimer's Disease</td> <td>=</td> <td>0.45 [0.22-0.93]</td> </tr> </table>                                  | sedentary | =              | Ref.                | Dementia | =    | 0.55 [0.30-1.01] | Alzheimer's Disease | =    | 0.45 [0.22-0.93] | <p>Categorical ranking of physical activity - no accurate quantify<br/>No changes of physical activity during the follow-up time<br/>No intensity or frequencies of physical activity<br/>Different follow up times</p> |      |      |         |     |      |                                                           |
| sedentary           | =                                                                   | Ref.                                                                                  |               |                                                                                                     |                   |                                        |                                                                                                                                                                                                                                            |                                                                                                                                                                                                                                                                                                                                                                                                                                                                                                                        |           |                |                     |          |      |                  |                     |      |                  |                                                                                                                                                                                                                         |      |      |         |     |      |                                                           |
| Dementia            | =                                                                   | 0.55 [0.30-1.01]                                                                      |               |                                                                                                     |                   |                                        |                                                                                                                                                                                                                                            |                                                                                                                                                                                                                                                                                                                                                                                                                                                                                                                        |           |                |                     |          |      |                  |                     |      |                  |                                                                                                                                                                                                                         |      |      |         |     |      |                                                           |
| Alzheimer's Disease | =                                                                   | 0.45 [0.22-0.93]                                                                      |               |                                                                                                     |                   |                                        |                                                                                                                                                                                                                                            |                                                                                                                                                                                                                                                                                                                                                                                                                                                                                                                        |           |                |                     |          |      |                  |                     |      |                  |                                                                                                                                                                                                                         |      |      |         |     |      |                                                           |

PA = physical activity; Ref. = Reference group

|                      |                                       |                                 |               |                                                                                    |                     |                     | Disease                                                                                                                                                                                     |                                                                                                                                                                                                                                                                                                                                                                                                                                                                                         |                                                                                                                                   |                    |                     |              |      |      |                 |                  |                  |                   |                  |                  |                |                  |                  |  |
|----------------------|---------------------------------------|---------------------------------|---------------|------------------------------------------------------------------------------------|---------------------|---------------------|---------------------------------------------------------------------------------------------------------------------------------------------------------------------------------------------|-----------------------------------------------------------------------------------------------------------------------------------------------------------------------------------------------------------------------------------------------------------------------------------------------------------------------------------------------------------------------------------------------------------------------------------------------------------------------------------------|-----------------------------------------------------------------------------------------------------------------------------------|--------------------|---------------------|--------------|------|------|-----------------|------------------|------------------|-------------------|------------------|------------------|----------------|------------------|------------------|--|
| Podewils et al. 2005 | Cardiovascular Health Cognition Study | Baseline: 1992 - 2000           | 8 years       | 5 888 men and women; 65 years and older                                            | 2 228 men and women | 3 660 men and women | PA: Modified Minnesota Leisure Time Physical Activity questionnaire<br><i>Outcome:</i> Cognitive Status Test, Cognitive Decline in the Elderly Test                                         | Inverse association between physical activity level and incidence of dementia in later life.<br>Hazard Ratios [95%CI] of incident dementia by level of leisure-time energy expenditure                                                                                                                                                                                                                                                                                                  | - High dropout rate<br>- Measurement of physical activity (Reliability of Minnesota Leisure Time Physical Activity Questionnaire) |                    |                     |              |      |      |                 |                  |                  |                   |                  |                  |                |                  |                  |  |
|                      |                                       |                                 |               |                                                                                    |                     |                     |                                                                                                                                                                                             | <table border="1"> <thead> <tr> <th></th> <th>All-cause dementia</th> <th>Alzheimer's disease</th> </tr> </thead> <tbody> <tr> <td>&lt;248 kcal/wk</td> <td>Ref.</td> <td>Ref.</td> </tr> <tr> <td>248-742 kcal/wk</td> <td>1.03 [0.81-1.31]</td> <td>0.99 [0.71-1.38]</td> </tr> <tr> <td>743-1,657 kcal/wk</td> <td>0.81 [0.63-1.05]</td> <td>0.79 [0.56-1.12]</td> </tr> <tr> <td>&gt;1,657 kcal/wk</td> <td>0.74 [0.57-0.96]</td> <td>0.64 [0.45-0.93]</td> </tr> </tbody> </table> |                                                                                                                                   | All-cause dementia | Alzheimer's disease | <248 kcal/wk | Ref. | Ref. | 248-742 kcal/wk | 1.03 [0.81-1.31] | 0.99 [0.71-1.38] | 743-1,657 kcal/wk | 0.81 [0.63-1.05] | 0.79 [0.56-1.12] | >1,657 kcal/wk | 0.74 [0.57-0.96] | 0.64 [0.45-0.93] |  |
|                      | All-cause dementia                    | Alzheimer's disease             |               |                                                                                    |                     |                     |                                                                                                                                                                                             |                                                                                                                                                                                                                                                                                                                                                                                                                                                                                         |                                                                                                                                   |                    |                     |              |      |      |                 |                  |                  |                   |                  |                  |                |                  |                  |  |
| <248 kcal/wk         | Ref.                                  | Ref.                            |               |                                                                                    |                     |                     |                                                                                                                                                                                             |                                                                                                                                                                                                                                                                                                                                                                                                                                                                                         |                                                                                                                                   |                    |                     |              |      |      |                 |                  |                  |                   |                  |                  |                |                  |                  |  |
| 248-742 kcal/wk      | 1.03 [0.81-1.31]                      | 0.99 [0.71-1.38]                |               |                                                                                    |                     |                     |                                                                                                                                                                                             |                                                                                                                                                                                                                                                                                                                                                                                                                                                                                         |                                                                                                                                   |                    |                     |              |      |      |                 |                  |                  |                   |                  |                  |                |                  |                  |  |
| 743-1,657 kcal/wk    | 0.81 [0.63-1.05]                      | 0.79 [0.56-1.12]                |               |                                                                                    |                     |                     |                                                                                                                                                                                             |                                                                                                                                                                                                                                                                                                                                                                                                                                                                                         |                                                                                                                                   |                    |                     |              |      |      |                 |                  |                  |                   |                  |                  |                |                  |                  |  |
| >1,657 kcal/wk       | 0.74 [0.57-0.96]                      | 0.64 [0.45-0.93]                |               |                                                                                    |                     |                     |                                                                                                                                                                                             |                                                                                                                                                                                                                                                                                                                                                                                                                                                                                         |                                                                                                                                   |                    |                     |              |      |      |                 |                  |                  |                   |                  |                  |                |                  |                  |  |
| Larson et al 2006    | Adults Changes in Thought             | Baseline: 1994/1996 – 2000/2002 | 6 years       | 6 782 men and women in study – Subgroup of 2 581 men and women; 65 years and older | 841 men and women   | 1 740 men and women | PA: Number of days a week the participants did each of presented exercises for at least 15 minutes at a time during the past year<br><i>Outcome:</i> Cognitive Ability Screening Instrument | Regular exercise reduces the risk of dementia<br>- Hazard Ratio [with 95% Confidence Interval] for developing dementia<br>regular activity: 0.62 [0.44-0.86]<br>- Incident rate for 1,000 person years<br>13.0 for >3 times active per week<br>19.0 for less than 3 times per week                                                                                                                                                                                                      | - measurement of physical activity                                                                                                |                    |                     |              |      |      |                 |                  |                  |                   |                  |                  |                |                  |                  |  |
| Chang et al. 2010    | AGES – Reykjavik                      | Baseline: 1967 - 2002           | 26 - 35 years | 5 764 men and                                                                      | 819 men and         | 2 093 men, 2        | PA: Questions                                                                                                                                                                               | Inverse association between midlife physical activity and cognitive function in later life.                                                                                                                                                                                                                                                                                                                                                                                             | - Measurement of physical activity                                                                                                |                    |                     |              |      |      |                 |                  |                  |                   |                  |                  |                |                  |                  |  |

PA = physical activity; Ref. = Reference group

|  |                                                                |  |  |                                 |       |                           |                                                                                                                                                                                                                                                                                                                         |                                                                                                                                                                                                                   |                                                    |
|--|----------------------------------------------------------------|--|--|---------------------------------|-------|---------------------------|-------------------------------------------------------------------------------------------------------------------------------------------------------------------------------------------------------------------------------------------------------------------------------------------------------------------------|-------------------------------------------------------------------------------------------------------------------------------------------------------------------------------------------------------------------|----------------------------------------------------|
|  | Study – Age, Gene / Environment Susceptibility Reykjavik Study |  |  | women; Born between 1907 - 1935 | women | 852 women – overall 4 945 | about the biography of physical activity during adult life and how many hours per week physical activity during winter and summer<br><i>Outcome:</i><br>Digit symbol substitution test, figure comparison, modified Stroop Test<br>California Verbal Learning Test, Digits Backward, CANTAB Spaital Working Memory test | Odds Ratios of having dementia mong physically active groups compared with none physical active group [95% CI]<br>No physical activity: 1.00 (Ref.)<br><5 h/wk: 0.59 [0.40 – 0.87]<br>>5 h/wk: 0.74 [0.34 – 1.62] | -No information about changes in physical activity |
|--|----------------------------------------------------------------|--|--|---------------------------------|-------|---------------------------|-------------------------------------------------------------------------------------------------------------------------------------------------------------------------------------------------------------------------------------------------------------------------------------------------------------------------|-------------------------------------------------------------------------------------------------------------------------------------------------------------------------------------------------------------------|----------------------------------------------------|

PA = physical activity; Ref. = Reference group
